# Supplementary material for: Multiple imputation methods for missing multilevel ordinal outcomes
Source: Springer Nature journal article supplement (doi:10.1186/s12874-023-01909-5), 2023-05-09

# Supplementary Materials for “Multiple Imputation Methods for Missing Multilevel Ordinal Outcomes”

Mei Dong, Aya Mitani

## 1 Details on Simulating Multilevel Ordinal Data with Informative Cluster Size

For every cluster  $i$ ,

1. Sample  $\boldsymbol{\omega}_i = (\omega_{i1}, \dots, \omega_{im})'$  from a multivariate normal distribution, with mean vector  $\mathbf{0}$  and variance matrix  $\boldsymbol{\Sigma}$ , where

$$\boldsymbol{\Sigma} = \begin{pmatrix} 1 & \tau & \dots & \tau \\ \tau & 1 & \dots & \tau \\ \vdots & \vdots & \ddots & \vdots \\ \tau & \dots & \tau & 1 \end{pmatrix}_{m \times m}$$

$\tau$  is the correlation between each pair of units within a cluster. We used the exchangeable correlation structure to generate correlation between teeth.

2. Compute  $\mathbf{u}_i = \Phi(\boldsymbol{\omega}_i)$ , where  $\Phi$  is the CDF of the standard normal distribution.
3. Compute  $\mathbf{b}_i = \frac{1}{\phi} \log \frac{\sin(\phi\pi\mathbf{u}_i)}{\sin(\phi\pi(1-\mathbf{u}_i))}$ , with  $\phi = 0.5$ .  $b_{ij}$  has marginal bridge distribution and  $b_{ij}$  and  $b_{ik}$  are correlated due to the correlation imposed by  $\omega_{ij}$ .
4. Compute the baseline level of risk  $\lambda_i$  for each cluster such that  $\lambda_i = \frac{\exp(\nu\bar{b}_i)}{1+\exp(\nu\bar{b}_i)}$ , where  $\bar{b}_i = \sum_j \frac{b_{ij}}{n_i}$ .
5. Sample CS  $n_i$  from a truncated Bin(28,  $\lambda_i$ ).
6. Generate the outcome  $Y_{ij}$ , which takes values from 1, 2, 3, and 4 from a multinomial distribution with a set of probability  $(P_{ij,1}, P_{ij,2}, P_{ij,3}, P_{ij,4})$  such that

$$P_{ij,1} = \Pr(Y_{ij} = 1 | b_{ij}, X_i, Z_i, \beta_1, \beta_2) = \theta_1$$

$$P_{ij,2} = \Pr(Y_{ij} = 2 | b_{ij}, X_i, Z_i, \beta_1, \beta_2) = \theta_2 - \theta_1$$

$$P_{ij,3} = \Pr(Y_{ij} = 3 | b_{ij}, X_i, Z_i, \beta_1, \beta_2) = \theta_3 - \theta_2$$

$$P_{ij,4} = \Pr(Y_{ij} = 4 | b_{ij}, X_i, Z_i, \beta_1, \beta_2) = 1 - \theta_3,$$

where  $\theta_c = \frac{\exp\{b_{ij} + (\eta_c + \beta_1 X_i + \beta_2 Z_i)\phi^{-1}\}}{1 + \exp\{b_{ij} + (\eta_c + \beta_1 X_i + \beta_2 Z_i)\phi^{-1}\}}$ ,  $c = 1, 2, 3$ .

7. Repeat for  $i = 1, \dots, N$  subjects.

8. Repeat the whole process for each auxiliary outcome with different values of  $\eta_c$ .

## 2 Supplementary Tables

Table S1: Baseline Characteristics of variables. PPD, ABL and Mobil are auxiliary variables used in the imputation phase.

| Variables          | Type          | Categories       | Summary Stats | Missing Rate |
|--------------------|---------------|------------------|---------------|--------------|
| Age                | subject-level | Median (range)   | 76 (60, 98)   | 0%           |
| Smoking status     | subject-level | Ever-smoker      | 40 (17%)      | 0%           |
| Education          | subject-level | High school      | 62 (26%)      | 0%           |
|                    |               | Some college     | 86 (36%)      |              |
|                    |               | College graduate | 93 (38%)      |              |
| Metabolic Syndrome | subject-level | Yes              | 95 (39%)      | 0%           |
| nteeeth            | subject-level | Median (range)   | 22 (1, 28)    | 0%           |
| CAL                | Tooth-level   | levels           | 4             | 19%          |
| PPD                | Tooth-level   | levels           | 4             | 10%          |
| ABL                | Tooth-level   | levels           | 6             | 25%          |
| Mobil              | Tooth-level   | levels           | 4             | 0.2%         |

Table S2: Results of intercept  $\eta_1$  and slope  $\beta_1$  when ICS=0.4, ICC=0.6, , missing rate was 20%, sample size  $N$  was 50, missing mechanism was MAR,  $C = 4$ .

| Parameter                          | Method | Mean Est | Mean SE | Empirical SE | Rel Bias (%) | Cov Prob (%) | MSE  |
|------------------------------------|--------|----------|---------|--------------|--------------|--------------|------|
| <b><math>\eta_1 = -0.4</math></b>  |        |          |         |              |              |              |      |
|                                    | Full   | -0.38    | 0.30    | 0.29         | 4.58         | 95.20        | 0.08 |
|                                    | CCA    | -0.10    | 0.29    | 0.32         | 76.03        | 76.68        | 0.19 |
|                                    | FCS+CS | -0.35    | 0.31    | 0.28         | 11.53        | 96.59        | 0.08 |
|                                    | FCS    | -0.32    | 0.32    | 0.29         | 19.78        | 94.46        | 0.09 |
|                                    | JM+CS  | -0.32    | 0.34    | 0.30         | 19.62        | 95.61        | 0.10 |
|                                    | JM     | -0.29    | 0.34    | 0.31         | 26.71        | 93.45        | 0.11 |
| <b><math>\beta_1 = -0.2</math></b> |        |          |         |              |              |              |      |
|                                    | Full   | -0.22    | 0.25    | 0.29         | -8.30        | 90.70        | 0.08 |
|                                    | CCA    | -0.10    | 0.28    | 0.34         | 50.82        | 87.34        | 0.13 |
|                                    | FCS+CS | -0.20    | 0.29    | 0.28         | -1.95        | 95.58        | 0.08 |
|                                    | FCS    | -0.17    | 0.30    | 0.29         | 17.16        | 95.87        | 0.08 |
|                                    | JM+CS  | -0.15    | 0.34    | 0.33         | 24.51        | 95.61        | 0.11 |
|                                    | JM     | -0.12    | 0.34    | 0.31         | 38.12        | 96.12        | 0.10 |

Table S3: Results of intercept  $\eta_1$  and slope  $\beta_1$  when ICS=0.1, ICC=0.3, , missing rate was 20%, sample size  $N$  was 50, missing mechanism was MCAR,  $C = 4$ .

| Parameter                          | Method | Mean Est | Mean SE | Empirical SE | Rel Bias (%) | Cov Prob (%) | MSE  |
|------------------------------------|--------|----------|---------|--------------|--------------|--------------|------|
| <b><math>\eta_1 = -0.4</math></b>  |        |          |         |              |              |              |      |
|                                    | Full   | -0.40    | 0.20    | 0.20         | -0.97        | 95.50        | 0.04 |
|                                    | CCA    | -0.40    | 0.21    | 0.21         | -1.03        | 94.90        | 0.05 |
|                                    | FCS+CS | -0.40    | 0.21    | 0.20         | -0.05        | 95.30        | 0.04 |
|                                    | FCS    | -0.40    | 0.21    | 0.20         | 0.48         | 95.50        | 0.04 |
|                                    | JM+CS  | -0.40    | 0.21    | 0.21         | -0.74        | 95.80        | 0.04 |
|                                    | JM     | -0.40    | 0.21    | 0.21         | -0.91        | 95.70        | 0.04 |
| <b><math>\beta_1 = -0.2</math></b> |        |          |         |              |              |              |      |
|                                    | Full   | -0.21    | 0.19    | 0.20         | -4.48        | 92.40        | 0.04 |
|                                    | CCA    | -0.21    | 0.20    | 0.22         | -6.43        | 92.30        | 0.05 |
|                                    | FCS+CS | -0.21    | 0.19    | 0.20         | -6.42        | 95.10        | 0.04 |
|                                    | FCS    | -0.21    | 0.19    | 0.20         | -5.89        | 94.20        | 0.04 |
|                                    | JM+CS  | -0.21    | 0.20    | 0.21         | -5.19        | 94.00        | 0.04 |
|                                    | JM     | -0.21    | 0.20    | 0.21         | -3.96        | 94.20        | 0.04 |

### 3 Supplementary Figures

Figure S1: Relationship between mean clinical attachment loss (CAL) score (0: < 2mm, 1: 2-2.9mm, 2: 3-4.9mm, 3:  $\geq$  5mm) and number of teeth per participant from Department of Veterans Affairs Longitudinal Dental Study ( $N=241$ ).

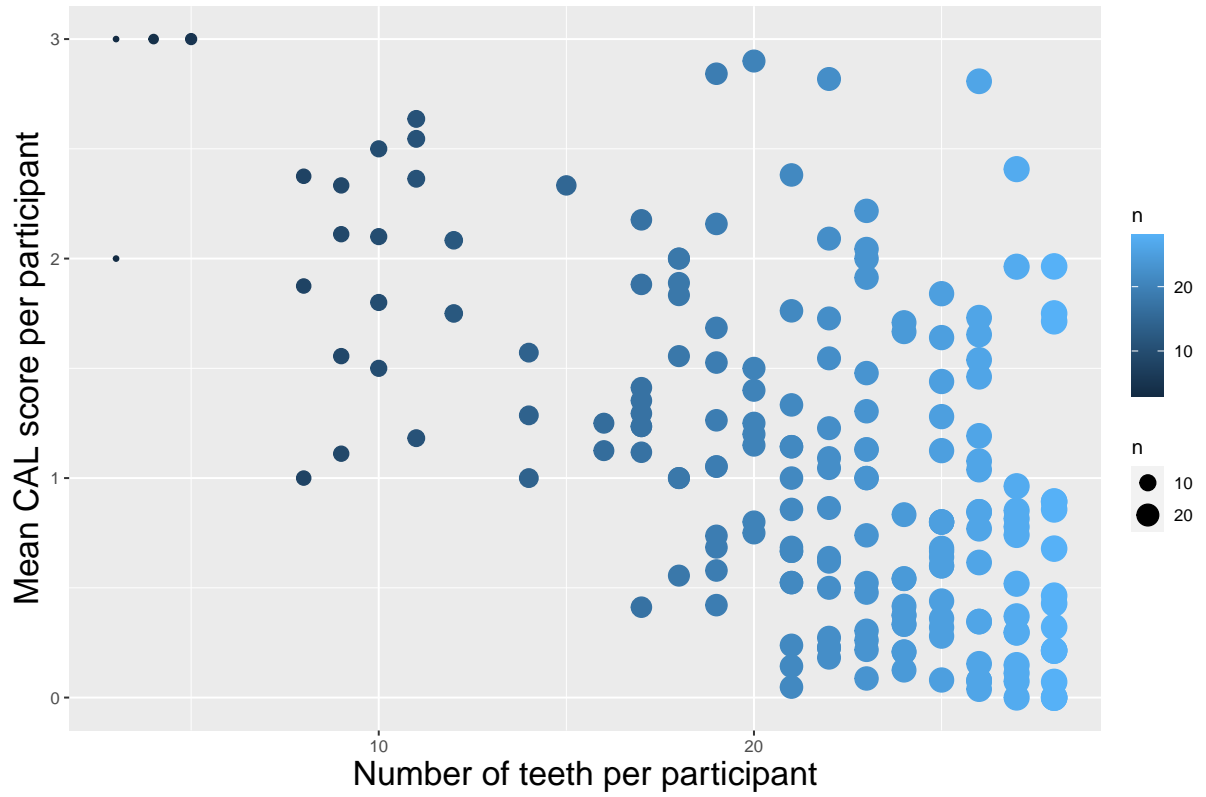

Figure S2: Mean relative bias of each imputation method and each parameter under different simulation scenarios. The missing data mechanism was MAR and  $C = 4$ . The missing rate was 50%. Each column in Figure 1 represents one combination of parameters of interest, degrees of ICS, and ICC, with two different sample sizes. The black line is the reference line at 0; the grey line represents the results using the full data; the green line represents the results using complete case analysis; the blue line represents the results using FCS+CS; the red line represents the results using FCS; the purple line represents the results using JM+CS; the orange line represents the results using JM.

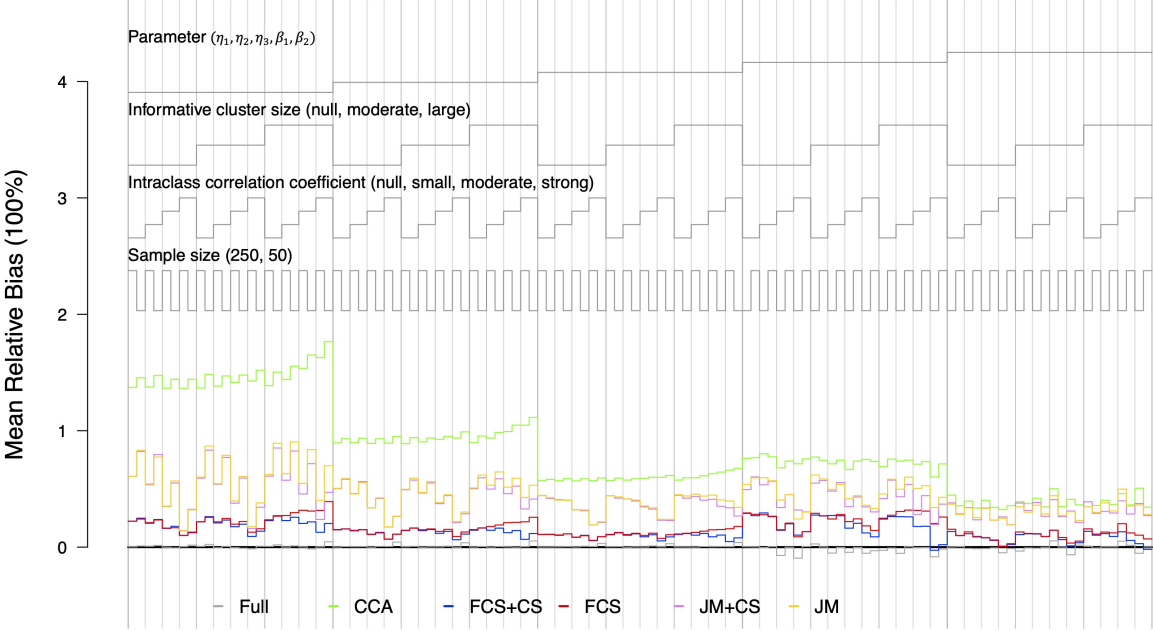

Figure S3: Mean relative bias of each imputation method and each parameter under different simulation scenarios. The missing data mechanism was MAR and  $C = 3$ . The missing rate was 20% and the sample size was 50. Each column represents one combination of parameters of interest and degrees of ICS, with four different values of ICC. The black line is the reference line at 0; the grey line represents the results using the full data; the green line represents the results using complete case analysis; the blue line represents the results using FCS+CS; the red line represents the results using FCS; the purple line represents the results using JM+CS; the orange line represents the results using JM.

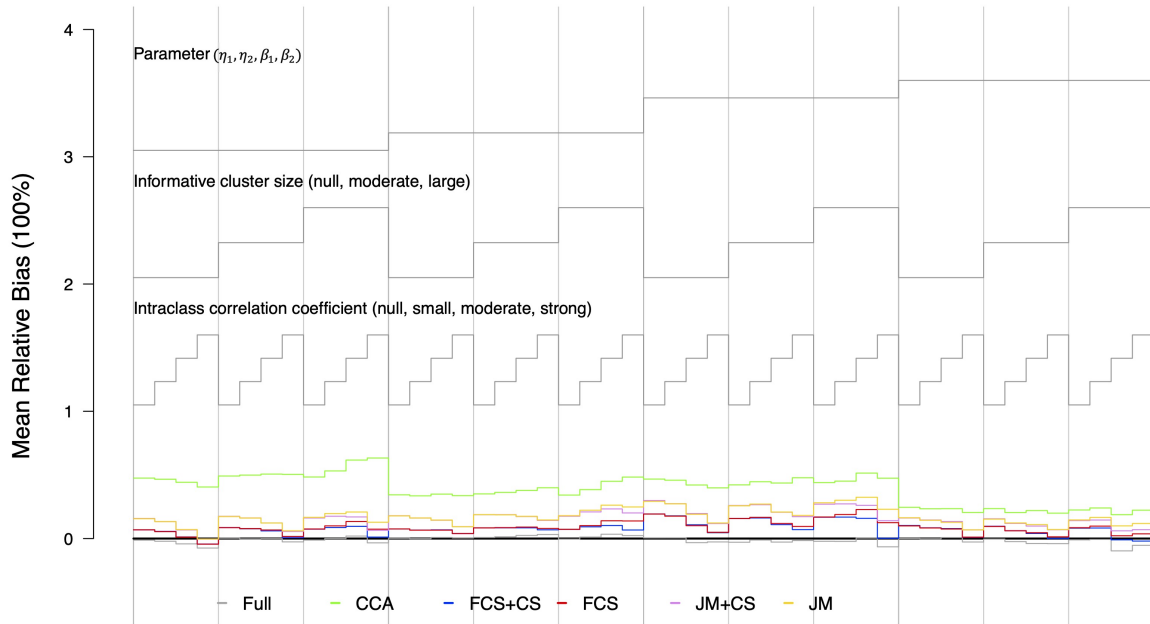

Figure S4: Mean relative bias of each imputation method and each parameter under different simulation scenarios. The missing data mechanism was MAR and  $C = 4$ . The missing rate was 20% and the sample size was 50. The ancillary variables were removed in the imputation model. Each column represents one combination of parameters of interest and degrees of ICS, with four different values of ICC. The black line is the reference line at 0; the grey line represents the results using the full data; the green line represents the results using complete case analysis; the blue line represents the results using FCS+CS; the red line represents the results using FCS; the purple line represents the results using JM+CS; the orange line represents the results using JM.

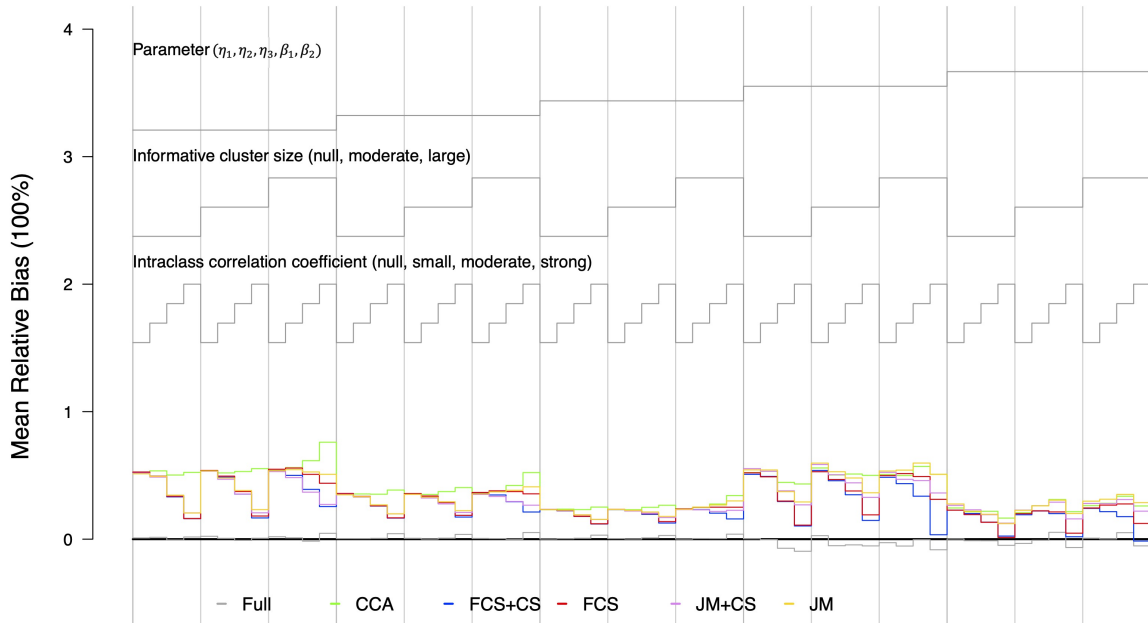



Figure S5: Mean relative bias of each imputation method and each parameter under different simulation scenarios. The missing data mechanism was MCAR and  $C = 4$ . The missing rate was 20% and the sample size was 50. Each column represents one combination of parameters of interest and degrees of ICC, with four different values of ICC. The black line is the reference line at 0; the grey line represents the results using the full data; the green line represents the results using complete case analysis; the blue line represents the results using FCS+CS; the red line represents the results using FCS; the purple line represents the results using JM+CS; the orange line represents the results using JM.

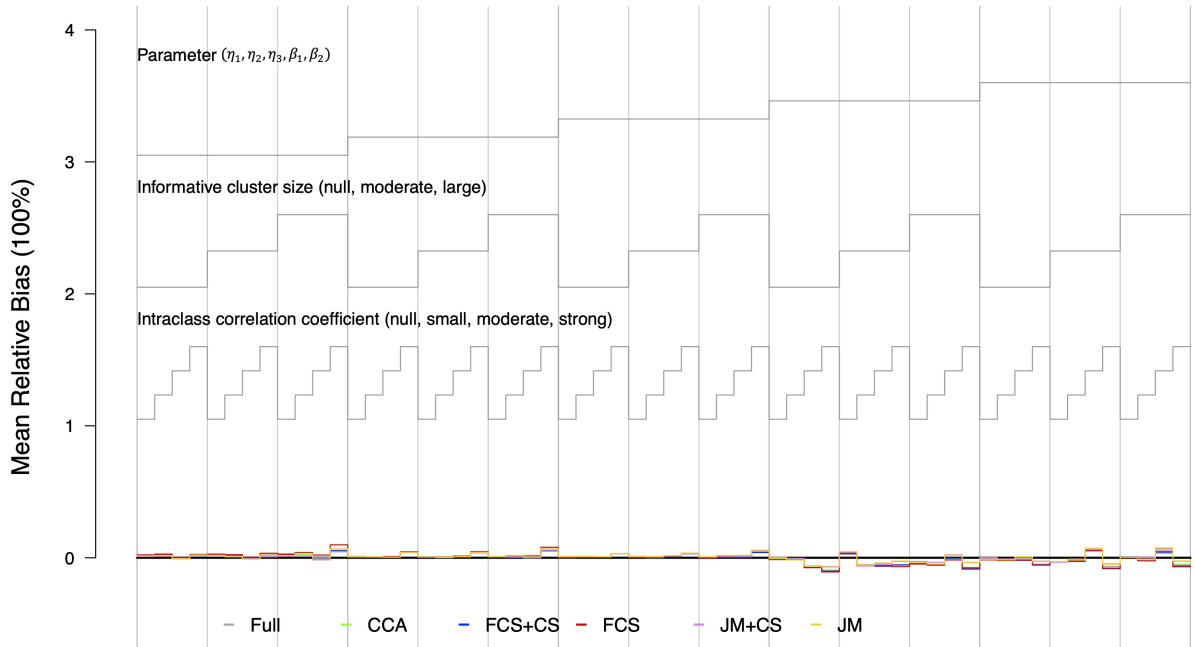

Supplement: MOESM1 [file 25336868]
